The author emphasizes the physiology and pathology of cardiac disease throughout the book. Valvular and congenital heart disease are the primary areas of focus of the work. The chapter on anesthesia for cardiac surgery in the first year of life, by D. J. Hatch, is outstanding, with a good discussion of specific lesions and profound hypothermia.

The book gives a somewhat dated picture of cardiac anesthesia and surgery, especially in the large sections on anesthesia for closed cardiac surgery and diagnostic procedures. The physiology, pharmacology and clinical management of coronary-artery disease and myocardial revascularization are barely mentioned. With coronary-artery surgery accounting for about 60–70 per cent of cardiac surgery in the United States, it is unfortunate that only two pages in the text deal with the patient undergoing coronary revascularization.

In addition, modern therapeutic and monitoring techniques are not covered. There is no discussion of pulmonary arterial cath-

eterization, ECG monitoring, or arrhythmia detection and treatment. Pharmacologic modalities such as vasodilator therapy for heart failure, and cardioplegic solutions, are not even mentioned. The intra-aortic balloon pump is dismissed in only two paragraphs, which state how poor the results have been. The principles of postoperative intensive care are covered on one page.

In short, this book presents in a didactic manner cardiac surgery at the present time in the United Kingdom. There is little discussion of alternate techniques and therapeutic modalities. The book is written in the British style and is quite clear. Unfortunately, it is out of date with respect to modern cardiac surgery and anesthesia in the United States.

JOEL A. KAPLAN, M.D.  
Department of Anesthesiology  
Emory University Hospital  
1364 Clifton Road, N.E.  
Atlanta, Georgia 30322

## Books Received

| Title & Edition                                                                                                                                                                                                                       | Author/Editor                                                                             | Publisher                                                                                          |       |         |
|---------------------------------------------------------------------------------------------------------------------------------------------------------------------------------------------------------------------------------------|-------------------------------------------------------------------------------------------|----------------------------------------------------------------------------------------------------|-------|---------|
|                                                                                                                                                                                                                                       |                                                                                           | Address, Name, Year                                                                                | Pages | Price   |
| <b>A Manual of Thoracic Surgery,</b><br>Second edition                                                                                                                                                                                | A. von Hippel                                                                             | Springfield<br>Charles C Thomas<br>1978                                                            | 247   | \$13.75 |
| <i>Thoracic physiology and surgery related to closed-chest drainage: inter alia the diaphragm, the chest wall, the pleura, air accumulations, the waterseal, the mediastinum, the lungs, the pericardium.</i>                         |                                                                                           |                                                                                                    |       |         |
| <b>Leukocyte Chemotaxis: Methods,<br/>Physiology and Clinical Implications</b>                                                                                                                                                        | J. I. Gallin<br>P. G. Quie<br>(editors)                                                   | New York<br>Raven Press<br>1977                                                                    | 444   | \$34.00 |
| <i>Proceedings of a conference, 28 papers.</i>                                                                                                                                                                                        |                                                                                           |                                                                                                    |       |         |
| <b>Second International Symposium on<br/>Malignant Hyperthermia</b>                                                                                                                                                                   | J. A. Aldrete<br>B. A. Britt                                                              | New York<br>Grune and Stratton<br>1978                                                             | 560   | \$25.50 |
| <i>Forty-seven papers from the 1977 symposium: muscle pathophysiology, porcine model studies, predictive tests, clinical observations, current treatment.</i>                                                                         |                                                                                           |                                                                                                    |       |         |
| <b>Clinical Physiology of the Lung</b>                                                                                                                                                                                                | K. B. Saunders                                                                            | Philadelphia<br>J. B. Lippincott<br>1978                                                           | 255   | \$26.00 |
| <i>Bridges the gap between undergraduate curricula and advanced textbooks. Pulmonary mechanics. Gas exchange. Acid-base chemistry. The respiratory control system. Asthma. Chronic bronchitis and emphysema. Respiratory failure.</i> |                                                                                           |                                                                                                    |       |         |
| <b>Immunotherapy of Cancer: Present Status<br/>of Trials in Man</b>                                                                                                                                                                   | W. D. Terry<br>D. Windhorst                                                               | New York<br>Raven Press<br>1977                                                                    | 726   | \$49.50 |
| <i>Symposium papers and discussions.</i>                                                                                                                                                                                              |                                                                                           |                                                                                                    |       |         |
| <b>Antiepileptic Drugs: Quantitative Analysis<br/>and Interpretation</b>                                                                                                                                                              | C. E. Pippenger<br>J. Kiffin Penry<br>H. Kutt<br>(editors)                                | New York<br>Raven Press<br>1977                                                                    | 384   | \$29.50 |
| <i>Analytic techniques; principles of clinical pharmacology and management; 28 papers from a symposium.</i>                                                                                                                           |                                                                                           |                                                                                                    |       |         |
| <b>The Health of the People</b>                                                                                                                                                                                                       | A review of Health<br>Services in the Republic<br>of South Africa in the<br>mid-seventies | Johannesburg, Republic of<br>South Africa<br>Chris van Rensburg<br>Publications (Pty) Ltd.<br>1977 | 140   | PNS     |
| <i>Describes the country's efforts to aid all its peoples in enhancing the quality of their lives. Preface by J. de Beer, Secretary for Health.</i>                                                                                   |                                                                                           |                                                                                                    |       |         |
| <b>Anesthesia in Obstetrics.<br/>Maternal, Fetal, and Neonatal Aspects</b>                                                                                                                                                            | G. A. Albright                                                                            | Menlo Park, California<br>The Benjamin/Cummings<br>Pub. Co.<br>1978                                | 480   | \$42.00 |
| <i>Both a practice manual for beginners and a reference and refresher manual for the more experienced.</i>                                                                                                                            |                                                                                           |                                                                                                    |       |         |

## Books Received (Continued)

| Title & Edition                                                                                                                                                                                                             | Author/Editor                                                                 | Publisher                                                                      | Pages | Price   |
|-----------------------------------------------------------------------------------------------------------------------------------------------------------------------------------------------------------------------------|-------------------------------------------------------------------------------|--------------------------------------------------------------------------------|-------|---------|
|                                                                                                                                                                                                                             |                                                                               | Address, Name, Year                                                            |       |         |
| <b>Cerebral Vascular Smooth Muscle and Its Control</b>                                                                                                                                                                      | Ciba Foundation Symposium No. 56 (new series)                                 | Philadelphia<br>J. B. Lippincott<br>1978<br>(Excerpta Medica, The Netherlands) | 408   | \$35.50 |
| <i>Papers and discussions by leading experts, under two main headings: response of the cerebral circulation to hypoxia, hypercapnia and perfusion pressure, and its response to alterations in cerebral metabolic rate.</i> |                                                                               |                                                                                |       |         |
| <b>Critical Care.</b><br>The Fortieth Hahnemann Symposium                                                                                                                                                                   | W. W. Oaks<br>K. Bharadwaja<br>D. A. Major<br>(editors)                       | New York<br>Grune and Stratton<br>1978                                         | 336   | \$29.75 |
| <i>A symposium from the Hahnemann Medical College and Hospital.</i>                                                                                                                                                         |                                                                               |                                                                                |       |         |
| <b>Gaddum's Pharmacology.</b><br>Eighth edition                                                                                                                                                                             | [Revised by]<br>A. S. V. Burgen<br>J. F. Mitchell                             | New York<br>Oxford University Press<br>1978                                    | 269   | \$11.95 |
| <i>Intends to provide a sound foundation on which the use of drugs in human therapeutics can be built.</i>                                                                                                                  |                                                                               |                                                                                |       |         |
| <b>Enzymes in Anesthesiology</b>                                                                                                                                                                                            | F. F. Foldes<br>(editor)                                                      | New York<br>Springer-Verlag New York<br>Inc.<br>1978                           | 368   | \$34.80 |
| <i>Eighty-eight pages on basic enzymology and chapters on acetylcholine metabolism, hepatic microsomal enzymes, catecholamine metabolism, the cyclic AMP system, respiratory enzymes, creatinine phosphokinase.</i>         |                                                                               |                                                                                |       |         |
| <b>Critical Issues in Psychiatric Diagnosis</b>                                                                                                                                                                             | R. L. Spitzer<br>D. F. Klein<br>(editors)                                     | New York<br>Raven Press<br>1978                                                | 356   | \$25.00 |
| <i>Sections on the concept of mental illness, psychological testing, genetic studies, biochemical and EEG differences.</i>                                                                                                  |                                                                               |                                                                                |       |         |
| <b>Taurine and Neurological Disorders</b>                                                                                                                                                                                   | A. Barbeau<br>R. J. Huxtable<br>(editors)                                     | New York<br>Raven Press<br>1978                                                | 482   | \$36.00 |
| <i>Research suggesting a role for this amino-acid in such neurologic disorders as retinal degeneration, epilepsy, and the ataxias.</i>                                                                                      |                                                                               |                                                                                |       |         |
| <b>Frontiers in Neuroendocrinology,</b><br>Volume 5                                                                                                                                                                         | W. F. Ganong<br>L. Martini<br>(editors)                                       | New York<br>Raven Press<br>1978                                                | 399   | \$24.50 |
| <i>Twelve reviews, including reviews of opioid peptides and the opiate receptor, the brain isorenin-angiotensin system, neurophysins.</i>                                                                                   |                                                                               |                                                                                |       |         |
| <b>Clinical Anesthesia Procedures of the Massachusetts General Hospital</b>                                                                                                                                                 | P. W. Lebowitz<br>(editor)                                                    | Boston<br>Little, Brown<br>1978                                                | 437   | \$10.95 |
| <i>A foundation of practical knowledge for the inexperienced or incompletely trained anesthetist, written primarily by recent house staff.</i>                                                                              |                                                                               |                                                                                |       |         |
| <b>Brain Energy Metabolism</b>                                                                                                                                                                                              | B. K. Siesjö                                                                  | Somerset, New Jersey<br>John Wiley & Sons, Inc.<br>1978                        | 607   | \$31.50 |
| <i>A detailed discussion of the coupling of metabolism, blood flow, and function and malfunction in the brain, including anesthesia, analgesia, and sedation.</i>                                                           |                                                                               |                                                                                |       |         |
| <b>Physiology and Pathobiology of Axons</b>                                                                                                                                                                                 | S. G. Waxman<br>(editor)                                                      | New York<br>Raven Press<br>1978                                                | 462   | \$32.50 |
| <i>A thorough compendium of the principles of structure and function of normal and abnormal axons.</i>                                                                                                                      |                                                                               |                                                                                |       |         |
| <b>Progress in Chemical Fibrinolysis and Thrombolysis,</b><br>Volume 3                                                                                                                                                      | J. F. Davidson<br>R. M. Rowan<br>M. M. Samama<br>P. C. Desnoyers<br>(editors) | New York<br>Raven Press<br>1978                                                | 631   | \$45.00 |
| <i>Up-to-date reviews of progress in fibrinolysis and related therapy.</i>                                                                                                                                                  |                                                                               |                                                                                |       |         |

## Books Received (Continued)

| Title & Edition                                                                                                                                                     | Author/Editor                                                | Publisher                                                        | Pages | Price                                                  |
|---------------------------------------------------------------------------------------------------------------------------------------------------------------------|--------------------------------------------------------------|------------------------------------------------------------------|-------|--------------------------------------------------------|
|                                                                                                                                                                     |                                                              | Address, Name, Year                                              |       |                                                        |
| <b>Medicine d'urgence</b>                                                                                                                                           | Ch. Virenque                                                 | 31052 Toulouse Cedex,<br>CHU Toulouse-Rangueil<br>France<br>1978 | 233   | 25 French francs                                       |
| <i>A practical guide to medical emergencies and their treatment.</i>                                                                                                |                                                              |                                                                  |       |                                                        |
| <b>Cell Differentiation and Neoplasia</b><br>(30th Annual Symposium on<br>Fundamental Cancer Research)                                                              | G. F. Saunders<br>(editor)                                   | New York<br>Raven Press<br>1978                                  | 570   | \$39.50                                                |
| <i>From the viewpoint of cancer as a disease of cell differentiation. A symposium of 32 papers.</i>                                                                 |                                                              |                                                                  |       |                                                        |
| <b>The Endorphins</b><br>(Advances in Biochemical<br>Psychopharmacology, Volume 18)                                                                                 | E. Costa<br>M. Trabucchi<br>(editors)                        | New York<br>Raven Press<br>1978                                  | 396   | \$28.00                                                |
| <i>Thirty-two chapters survey the many facets of endorphin biochemistry, metabolism, and function.</i>                                                              |                                                              |                                                                  |       |                                                        |
| <b>Immune Modulation and Control of<br/>Neoplasia by Adjuvant Therapy</b>                                                                                           | M. A. Chirigos<br>(editor)                                   | New York<br>Raven Press<br>1978                                  | 520   | \$39.00                                                |
| <i>Reviews of findings with levamisole, glucan, thymosin, pyran; also other adjuvants.</i>                                                                          |                                                              |                                                                  |       |                                                        |
| <b>Clinical Neuropharmacology,</b><br>Volume 3                                                                                                                      | H. L. Klawans<br>(editor)                                    | New York<br>Raven Press<br>1978                                  | 221   | \$19.50                                                |
| <i>Eleven critical reviews on the pharmacology of convulsive disorders, the roles of serotonin, enkephalin and the endorphins, and other topics.</i>                |                                                              |                                                                  |       |                                                        |
| <b>Parkinson's Disease</b><br>A Guide for Patient and Family                                                                                                        | R. C. Duvoisin                                               | New York<br>Raven Press<br>1978                                  | 196   | \$ 9.50<br>(Paperback)                                 |
| <i>Discusses the fundamental pathology, symptoms, course, and treatment by older and new drugs.</i>                                                                 |                                                              |                                                                  |       |                                                        |
| <b>Evaluations of Drug Reactions,</b><br>Second edition supplement                                                                                                  | Published by the<br>American Pharmaceu-<br>tical Association | 2215 Constitution Ave. N.W.<br>Washington, D. C. 20037<br>1978   | 626   | \$ 7.00<br>(APhA member<br>rate \$4.00)<br>(Paperback) |
| <i>Contains 36 additional evaluations and a new feature, 31 abbreviated monographs.</i>                                                                             |                                                              |                                                                  |       |                                                        |
| <b>Carcinogenesis, Volume 2</b><br>Mechanisms of Tumor Promotion and<br>Cocarcinogenesis                                                                            | T. J. Slaga<br>A. Sivak<br>R. K. Boutwell<br>(editors)       | New York<br>Raven Press<br>1978                                  | 605   | \$45.00                                                |
| <i>Directed to all scientists interested in better understanding the induction of cancer.</i>                                                                       |                                                              |                                                                  |       |                                                        |
| <b>Pain—New Perspectives in Measurement<br/>and Management</b>                                                                                                      | A. W. Harcus<br>R. B. Smith<br>B. A. Whittle<br>(editors)    | New York<br>Churchill Livingstone<br>1978                        | 194   | \$23.50                                                |
| <i>Based on a two-day symposium held in May 1977.</i>                                                                                                               |                                                              |                                                                  |       |                                                        |
| <b>Hepatotoxicity</b>                                                                                                                                               | H. J. Zimmerman                                              | New York<br>Appleton-Century-Crofts<br>1978                      | 597   | \$48.50                                                |
| <i>General considerations. Experimental hepatotoxicity. Environmental hepatotoxicity. Iatrogenic hepatic injury, including a long chapter on anesthetic agents.</i> |                                                              |                                                                  |       |                                                        |
| <b>General Surgical Operations</b>                                                                                                                                  | R. M. Kirk<br>(editor)                                       | New York<br>Churchill Livingstone<br>1978                        | 412   | \$37.50                                                |
| <i>A practical manual for the general surgeon. Includes a chapter on anesthesia-related techniques.</i>                                                             |                                                              |                                                                  |       |                                                        |
